# Supplementary material for: Exopolysaccharide Biosynthesis in Rhizobium leguminosarum bv. trifolii Requires a Complementary Function of Two Homologous Glycosyltransferases PssG and PssI
Source: MDPI journal article supplement (doi:10.3390/ijms24044248), 2023-02-20
Supplement: s1 [file s1]

**Exopolysaccharide biosynthesis in *Rhizobium leguminosarum* bv. *trifolii* requires a complementary function of two homologous glycosyltransferases PssG and PssI**

Kamil Żebracki<sup>1</sup>, Aleksandra Horbowicz<sup>1</sup>, Małgorzata Marczak<sup>1,\*</sup>, Anna Turska-Szewczuk<sup>1</sup>, Piotr Koper<sup>1</sup>,  
Klaudia Wójcik<sup>1</sup>, Marceł Romańczuk<sup>1</sup>, Magdalena Wójcik<sup>1</sup>, and Andrzej Mazur<sup>1</sup>

<sup>1</sup> Department of Genetics and Microbiology, Institute of Biological Sciences, Maria Curie-Skłodowska University, Akademicka 19 St., 20-033 Lublin, Poland; kamil.zebracki@mail.umcs.pl (K.Ż.); aleksandra9602@gmail.com (A.H.); malgorzata.marczak@mail.umcs.pl (M.M.); anna.turska-szewczuk@mail.umcs.pl (A.T.-S.); piotr.koper@mail.umcs.pl (P.K.); klaudiawojcik2398@gmail.com (K.W.); marcel.romanczuk11@gmail.com (M.R.), magdalena.wojcik2@mail.umcs.pl (M.W.); andrzej.mazur@mail.umcs.pl (A.M.)

\* Correspondence: malgorzata.marczak@mail.umcs.pl (M.M.)

This PDF file includes:

Supplementary Tables S1 to S8

Supplementary Figures S1 to S3

Supplementary References

**Supplementary Table S1. List of primers used for RT-PCR of 5'-part of the Pss-I region**

| Amplicon<br>(as in<br>Fig. 1) | Amplified region                                                                                                                                                       | Primer      | Sequence (5'–3')          | Reference |
|-------------------------------|------------------------------------------------------------------------------------------------------------------------------------------------------------------------|-------------|---------------------------|-----------|
| 1                             | the last 416 bp of <i>mgl2</i> , <i>mgl2–regA</i> intergenic region, and the initial 427 bp of <i>regA</i>                                                             | mgl2-RT_Fw  | CTCGGCCTACGACGACCCTTCA    | This work |
|                               |                                                                                                                                                                        | regA-RT_Rv  | ATAACCGAATCGTGCAACTCACTG  | This work |
| 2                             | the initial 40 bp of <i>mgl2</i> , <i>mgl2–pssV</i> intergenic region, and the initial 9 bp of <i>pssV</i>                                                             | mgl2-RT_Fw  | TGGCGTGAACATAGGTGGCTG     | This work |
|                               |                                                                                                                                                                        | pssV-RT_Rv  | ATCGGGCAAGCTTGTCTTCTCC    | This work |
| 3                             | the last 85 bp of <i>pssV</i> , <i>pssV–pssW</i> intergenic region, and the initial 50 bp of <i>pssW</i>                                                               | pssV-RT_Fw  | CGAGACCGACAGCCCACAA       | This work |
|                               |                                                                                                                                                                        | pssW-RT_Rv  | CATATCCGCTGCATCATACTCCA   | This work |
| 4                             | the last 593 bp of <i>pssW</i> , <i>pssW–pssS</i> intergenic region, and the initial 159 bp of <i>pssS</i>                                                             | pssW-RT_Fw  | CAGCGGATATGCGGGATTGTGTT   | This work |
|                               |                                                                                                                                                                        | pssS-RT_Rv  | GTCATGAACCGGAACAGTGGATTT  | This work |
| 5                             | the last 453 bp of <i>pssS</i> and the initial 251 bp of <i>pssR</i>                                                                                                   | pssS-RT_Fw  | TTGAAGGAGGAAATCGAAGCACTG  | This work |
|                               |                                                                                                                                                                        | pssR-RT_Rv  | TGAAGGTAGAGCCCGCGTGTGAGG  | This work |
| 6                             | the last 10 bp of <i>pssS</i> , the whole <i>pssR</i> , and the initial 129 bp of <i>pssM</i>                                                                          | pssR-RT_Fw  | TCGGACTTGATGGTGCAGACAGGA  | This work |
|                               |                                                                                                                                                                        | pssM-RT_Rv  | GACTTTTCGGCGGGTTGGTGTA    | This work |
| 7                             | the last 903 bp of <i>pssM</i> , <i>pssM–pssL</i> intergenic region, and the initial 372 bp of <i>pssL</i>                                                             | pssM-RT_Fw  | ACTTTTTCTCGGCATCGGTTTCG   | This work |
|                               |                                                                                                                                                                        | pssL-RT_Rv  | CAGCCGGGGCTCGTTGTAAAA     | This work |
| 8                             | the last 343 bp of <i>pssL</i> , <i>pssL–pssK</i> intergenic region, and the initial 398 bp of <i>pssK</i>                                                             | pssL-RT_Fw  | GGGCTGATTTCACCGTAGTCAA    | This work |
|                               |                                                                                                                                                                        | pssK-RT_Rv  | TCGATGCGCTCAGGCGAACTGTAG  | This work |
| 9                             | the last 117 bp of <i>pssK</i> , <i>pssK–pssJ</i> intergenic region, and the initial 265 bp of <i>pssJ</i>                                                             | pssK-RT_Fw  | GGCGGCACCGACCTTTCATA      | This work |
|                               |                                                                                                                                                                        | pssJ-RT_Rv  | CCCGGAAGGCATCAAGGAAGTCTT  | This work |
| 10                            | the last 401 bp of <i>pssJ</i> , <i>pssJ–pssI</i> intergenic region, and the initial 87 bp of <i>pssI</i>                                                              | pssJ-RT_Fw  | TCTGGGACGATGGCGGTAGTTT    | This work |
|                               |                                                                                                                                                                        | pssI-RT_Rv1 | GTGCACCAAGGAATCCAAAGTATG  | This work |
| 11                            | the last 117 bp of <i>pssK</i> , <i>pssK–pssJ</i> intergenic region, the whole <i>pssJ</i> , <i>pssJ–pssI</i> intergenic region, and the initial 87 bp of <i>pssI</i>  | pssK-RT_Fw  | GGCGGCACCGACCTTTCATA      | This work |
|                               |                                                                                                                                                                        | pssI-RT_Rv1 | GTGCACCAAGGAATCCAAAGTATG  | This work |
| 12                            | the last 117 bp of <i>pssK</i> , <i>pssK–pssJ</i> intergenic region, the whole <i>pssJ</i> , <i>pssJ–pssI</i> intergenic region, and the initial 466 bp of <i>pssI</i> | pssK-RT_Fw  | GGCGGCACCGACCTTTCATA      | This work |
|                               |                                                                                                                                                                        | pssI-RT_Rv2 | ACGGTCCGCTTTGGGTGTC       | This work |
| 13                            | the last 822 bp of <i>pssJ</i> , <i>pssJ–pssI</i> intergenic region, and the initial 466 bp of <i>pssI</i>                                                             | pssJ-RT_Fw2 | CTCGGAAAGGGCAGCAAGGAAGA   | This work |
|                               |                                                                                                                                                                        | pssI-RT_Rv2 | ACGGTCCGCTTTGGGTGTC       | This work |
| 14                            | the last 285 bp of <i>pssI</i> , <i>pssI–pssH</i> intergenic region, and the initial 244 bp of <i>pssH</i>                                                             | pssI-RT_Fw  | TGGATTCCGGCATCAAGTGTC     | This work |
|                               |                                                                                                                                                                        | pssH-RT_Rv  | GGCGGAAGCCCAAAGTCAATG     | This work |
| 15                            | the last 774 bp of <i>pssH</i> , <i>pssH–pssG</i> intergenic region, and the initial 326 bp of <i>pssG</i>                                                             | pssH-RT_Fw  | TTGAGCCAAAACAAGGTAAGCAGTA | This work |
|                               |                                                                                                                                                                        | pssG-RT_Rv  | CATGCAGCGATCGAACTCAACCA   | This work |
| 16                            | the last 113 bp of <i>pssG</i> , the whole <i>pssF</i> , and the initial 410 bp of <i>pssC</i>                                                                         | pssG-RT_Fw  | GGTTCTGGGCCATCTGGAAGTA    | [1]       |
|                               |                                                                                                                                                                        | pssC-RT_Rv  | CGGTTTTTCTCCCGTGTCTCCAG   | This work |
| 17                            | the last 113 bp of <i>pssG</i> and the initial 168 bp of <i>pssF</i>                                                                                                   | pssG-RT_Fw  | GGTTCTGGGCCATCTGGAAGTA    | [1]       |
|                               |                                                                                                                                                                        | pssF-RT_Rv  | CAGGATCCGCTCGCCATAGG      | [1]       |
| 18                            | the last 264 bp of <i>pssF</i> and the initial 410 bp of <i>pssC</i>                                                                                                   | pssF-RT_Fw  | GGCACAAGCAGGGCAAAGACAC    | This work |
|                               |                                                                                                                                                                        | pssC-RT_Rv  | CGGTTTTTCTCCCGTGTCTCCAG   | This work |
| 19                            | the last 263 bp of <i>pssC</i> , <i>pssC–pssD</i> intergenic region, and the initial 129 bp of <i>pssD</i>                                                             | pssC-RT_Fw  | GGAAATGGGTGCTGCAAAGACAAT  | This work |
|                               |                                                                                                                                                                        | pssD-RT_Rv  | AAGCAGCCCTGGGATGGTTGT     | This work |
| 20                            | the last 257 bp of <i>pssD</i> and the                                                                                                                                 | pssD-RT_Fw  | GCTTTTTCAGCGCCTTCTCCA     | This work |

|   |                                                                                                              |             |                          |           |
|---|--------------------------------------------------------------------------------------------------------------|-------------|--------------------------|-----------|
|   | initial 255 bp of <i>pssE</i>                                                                                | pssE-RT_Rv  | AATGATCGGCTTCCCAAAACGC   | This work |
| C | the initial 69 bp of <i>lasI</i> , <i>lasI-repA</i> intergenic region, and the initial 91 bp of <i>repAa</i> | lasI-RT_Fw  | CCGGTACATTTGATCGAGAAGTGC | [1]       |
|   |                                                                                                              | repAa-RT-Rv | ACTGCAACTGCGCTGACAACATCT | [1]       |

The primer names include the annotation of adjacent genes. 'Fw' and 'Rv' refers to the forward and reverse primer, respectively.

**Supplementary Table S2. List of plasmids and primers used for promoter activity assay**

| Plasmid    | Relevant description <sup>a</sup>                                                                                                                         | Reference |
|------------|-----------------------------------------------------------------------------------------------------------------------------------------------------------|-----------|
| pMPK       | IncP, <i>mob</i> , promoterless <i>lacZ</i> , Tc <sup>R</sup> , Km <sup>R</sup>                                                                           | [2]       |
| PregA      | pMPK with 296 bp KpnI-XbaI fragment comprising the last 40 bp of <i>mgl2</i> , <i>mgl2-regA</i> intergenic region, and the initial 81 bp of <i>regA</i>   | This work |
| PpssV      | pMPK with 675 bp KpnI fragment comprising the initial 40 bp of <i>mgl2</i> and <i>mgl2-pssV</i> intergenic region                                         | This work |
| PpssW      | pMPK with 743 bp KpnI-XbaI fragment comprising 693 bp upstream of <i>pssW</i> and the initial 50 bp of <i>regA</i>                                        | This work |
| PpssI      | pMPK with 524 bp KpnI-XbaI fragment comprising the last 307 bp of <i>pssJ</i> , <i>pssJ-pssI</i> intergenic region, and the initial 134 bp of <i>pssI</i> | This work |
| PpssH      | pMPK with 650 bp KpnI-XbaI fragment comprising the last 332 bp of <i>pssI</i> , <i>pssI-pssH</i> intergenic region, and the initial 147 bp of <i>pssH</i> | This work |
| PpssG      | pMPK with 501 bp KpnI-XbaI fragment comprising the last 322 bp of <i>pssH</i> , <i>pssH-pssG</i> intergenic region, and the initial 88 bp of <i>pssG</i>  | This work |
| PpssD      | pMPK with 604 bp KpnI-XbaI fragment comprising the last 263 bp of <i>pssC</i> , <i>pssC-pssD</i> intergenic region, and the initial 129 bp of <i>pssD</i> | This work |
| Primer     | Sequence (5'-3') <sup>b</sup>                                                                                                                             | Reference |
| PregAFwKpn | aaaggtaccATTGATTTTCGGACGGCATTCGTCC                                                                                                                        | This work |
| PregARvXba | aatctagaGGTCATCCCCGAGCGTCTTCC                                                                                                                             | This work |
| PpssVFwKpn | aaaggtaccTGGCGTGAACATAGGTGGCTG                                                                                                                            | This work |
| PpssVRvKpn | aaaggtaccGCTTGTCTTCTCCGGCGTGCGA                                                                                                                           | This work |
| PpssWFwKpn | aaaggtaccCTGCGCAACGGTTTCACAGGACT                                                                                                                          | This work |
| PpssWRvXba | aaatctagaACATACAACAGGGCGAGCGGAACC                                                                                                                         | This work |
| PpssIFwKpn | aaaggtaccGCCGACCCGCTTTGAGGATGC                                                                                                                            | This work |
| PpssIRvXba | aaatctagaTTGTTGTCGACGGCTATCAGTTCC                                                                                                                         | This work |
| PpssHFwKpn | aaaggtaccCCAATGGCGCCAAGTCCTATC                                                                                                                            | This work |
| PpssHRvXba | aaatctagaAGAGTCGTCGCTGCTGTTGTTG                                                                                                                           | This work |
| PpssGFwKpn | aaaggtaccCGGGGTTTCGGCACATTGTCA                                                                                                                            | This work |
| PpssGRvXba | aaatctagaGCCCCAACATCGAATCCAGCATC                                                                                                                          | This work |
| PpssDFwKpn | aaaggtaccGGAAATGGGTGCTGCAAGACAAT                                                                                                                          | This work |
| PpssDRvXba | aaatctagaAAGCAGCCCTGGGATGGTTGT                                                                                                                            | This work |

<sup>a</sup> Abbreviations: Km<sup>R</sup>, kanamycin resistance; Tc<sup>R</sup>, tetracycline resistance

<sup>b</sup> Introduced restriction sites are underlined

**Supplementary Table S3. List of *E. coli* and *R. leguminosarum* strains used in this work**

| Strain                                                       | Relevant description                                                                                                                                                                                                                                                                | Reference |
|--------------------------------------------------------------|-------------------------------------------------------------------------------------------------------------------------------------------------------------------------------------------------------------------------------------------------------------------------------------|-----------|
| <b><i>E. coli</i></b>                                        |                                                                                                                                                                                                                                                                                     |           |
| DH5 $\alpha$                                                 | F <sup>-</sup> $\phi$ 80 <i>lacZ</i> $\Delta$ M15 $\Delta$ ( <i>lacZYA-argF</i> ) U169 <i>deoR recA1 endA1 hsdR17</i> (r <sub>k</sub> <sup>-</sup> , m <sub>k</sub> <sup>+</sup> ) <i>phoA supE44</i> $\lambda^-$ <i>thi-1 gyrA96 relA1</i> , high efficiency transformation strain | [3]       |
| S17-1                                                        | 294 derivative, RP4-2-Tc::Mu-Km::Tn7 chromosomally integrated, mobilizing donor strain                                                                                                                                                                                              | [4]       |
| M15 (pREP4)                                                  | host strain for the pQE-30 vector carries the pREP4 ( <i>lacI<sup>q</sup> Km<sup>r</sup> p14A ori</i> ) repressor plasmid                                                                                                                                                           | Qiagen    |
| DHM1                                                         | Reporter strain for BTH system; F- <i>glnV44</i> (AS) <i>recA1 endA gyrA96 thi-1 hsdR17 spoT1 rfbD1 cya-854</i>                                                                                                                                                                     | [5]       |
| <b><i>R. leguminosarum</i> bv. <i>trifolii</i></b>           |                                                                                                                                                                                                                                                                                     |           |
| RtTA1                                                        | wild-type strain, Str <sup>R</sup> , Rif <sup>R</sup>                                                                                                                                                                                                                               | [6]       |
| $\Delta$ <i>pssI</i> (Gm <sup>R</sup> )                      | RtTA1 $\Delta$ <i>pssI</i> ::Gm <sup>R</sup>                                                                                                                                                                                                                                        | This work |
| $\Delta$ <i>pssI</i> [pCM157]                                | RtTA1 $\Delta$ <i>pssI</i> carrying pCM157 <i>cre</i> expressing vector                                                                                                                                                                                                             | This work |
| $\Delta$ <i>pssI</i>                                         | RtTA1 $\Delta$ <i>pssI</i>                                                                                                                                                                                                                                                          | This work |
| $\Delta$ <i>pssI</i> ( <i>pssI</i> -lc)                      | RtTA1 $\Delta$ <i>pssI</i> carrying pRK <i>pssI</i> -C                                                                                                                                                                                                                              | This work |
| $\Delta$ <i>pssI</i> ( <i>pssI</i> -mc)                      | RtTA1 $\Delta$ <i>pssI</i> carrying pBK <i>pssI</i> -C                                                                                                                                                                                                                              | This work |
| $\Delta$ <i>pssI</i> ( <i>pssI</i> /his)                     | RtTA1 $\Delta$ <i>pssI</i> carrying pBK <i>pssI</i> -His6                                                                                                                                                                                                                           | This work |
| WT( <i>pssI</i> -lc)                                         | RtTA1 carrying pRK <i>pssI</i> -C                                                                                                                                                                                                                                                   | This work |
| WT( <i>pssI</i> -mc)                                         | RtTA1 carrying pBK <i>pssI</i> -C                                                                                                                                                                                                                                                   | This work |
| $\Delta$ <i>pssG</i> (Gm <sup>R</sup> )                      | RtTA1 $\Delta$ <i>pssG</i> ::Gm <sup>R</sup>                                                                                                                                                                                                                                        | This work |
| $\Delta$ <i>pssG</i> [pCM157]                                | RtTA1 $\Delta$ <i>pssG</i> carrying pCM157 <i>cre</i> expressing vector                                                                                                                                                                                                             | This work |
| $\Delta$ <i>pssG</i>                                         | RtTA1 $\Delta$ <i>pssG</i>                                                                                                                                                                                                                                                          | This work |
| $\Delta$ <i>pssG</i> ( <i>pssG</i> )                         | RtTA1 $\Delta$ <i>pssG</i> carrying pBK <i>pssG</i> -C                                                                                                                                                                                                                              | This work |
| $\Delta$ <i>pssG</i> ( <i>pssG</i> his)                      | RtTA1 $\Delta$ <i>pssG</i> carrying pBK <i>pssG</i> -His6                                                                                                                                                                                                                           | This work |
| $\Delta$ <i>pssI</i> $\Delta$ <i>pssG</i>                    | RtTA1 $\Delta$ <i>pssI</i> strain carrying the second mutation $\Delta$ <i>pssG</i> ::Gm <sup>R</sup>                                                                                                                                                                               | This work |
| $\Delta$ <i>pssI</i> $\Delta$ <i>pssG</i> ( <i>pssG</i> )    | RtTA1 $\Delta$ <i>pssI</i> $\Delta$ <i>pssG</i> double mutant carrying pBK <i>pssG</i> -C                                                                                                                                                                                           | This work |
| $\Delta$ <i>pssI</i> $\Delta$ <i>pssG</i> ( <i>pssI</i> -lc) | RtTA1 $\Delta$ <i>pssI</i> $\Delta$ <i>pssG</i> double mutant carrying pRK <i>pssI</i> -C                                                                                                                                                                                           | This work |
| $\Delta$ <i>pssV</i> (Gm <sup>R</sup> )                      | RtTA1 $\Delta$ <i>pssV</i> ::Gm <sup>R</sup>                                                                                                                                                                                                                                        | This work |
| $\Delta$ <i>pssV</i> [pCM157]                                | RtTA1 $\Delta$ <i>pssV</i> carrying pCM157 <i>cre</i> expressing vector                                                                                                                                                                                                             | This work |
| $\Delta$ <i>pssV</i>                                         | RtTA1 $\Delta$ <i>pssV</i>                                                                                                                                                                                                                                                          | This work |
| $\Delta$ <i>pssV</i> $\Delta$ <i>pssE</i>                    | RtTA1 $\Delta$ <i>pssV</i> strain carrying the second mutation $\Delta$ <i>pssE</i> ::Gm <sup>R</sup>                                                                                                                                                                               | This work |
| $\Delta$ <i>pssV</i> $\Delta$ <i>pssE</i> [pCM157]           | RtTA1 $\Delta$ <i>pssV</i> $\Delta$ <i>pssE</i> double mutant carrying pCM157 <i>cre</i> expressing vector                                                                                                                                                                          | This work |
| $\Delta$ GT <sub>9</sub>                                     | RtTA1 with deletion of the <i>pssV-pssE</i> region                                                                                                                                                                                                                                  | This work |
| $\Delta$ GT <sub>10</sub>                                    | RtTA1 with deletion of the <i>pssV-pssE</i> region carrying additional <i>pssA</i> ::Gm <sup>R</sup> mutation                                                                                                                                                                       | This work |
| $\Delta$ GT <sub>10</sub> ( <i>pssG</i> his)                 | $\Delta$ GT <sub>10</sub> RtTA1 derivative carrying pBK <i>pssG</i> -His6                                                                                                                                                                                                           | This work |
| $\Delta$ GT <sub>10</sub> ( <i>pssI</i> /his)                | $\Delta$ GT <sub>10</sub> RtTA1 derivative carrying pBK <i>pssI</i> -His6                                                                                                                                                                                                           | This work |

**Supplementary Table S4. List of plasmids used for mutagenesis and genetic complementation**

| Plasmid        | Relevant characteristics                                                                                                                                                                                                         | Reference |
|----------------|----------------------------------------------------------------------------------------------------------------------------------------------------------------------------------------------------------------------------------|-----------|
| pCM351         | <i>ori</i> ColE1, <i>oriT</i> , Ap <sup>R</sup> , Gm <sup>R</sup> , Tc <sup>R</sup> , allelic exchange vector                                                                                                                    | [7]       |
| pCM157         | <i>ori</i> IncP, <i>oriT</i> , Tc <sup>R</sup> , <i>cre</i> expression vector                                                                                                                                                    | [7]       |
| pBBR1-MCS2     | pBBR1 <i>rep</i> , <i>mob</i> , <i>lacZa</i> multi cloning site, Km <sup>R</sup> , broad-host-range cloning vector                                                                                                               | [8]       |
| pRK7813        | IncP, <i>oriT</i> , <i>cos</i> , <i>lacZa</i> multi cloning site, Tc <sup>R</sup> , cosmid cloning vector                                                                                                                        | [9]       |
| pCGpssI-U      | pCM351 with 610 bp EcoRI–NdeI fragment comprising last 527 bp of <i>pssJ</i> and <i>pssJ–pssI</i> intergenic region                                                                                                              | This work |
| pCGpssI-UD     | pCGpssI-U with 600 bp ApaI–SacI fragment comprising <i>pssI–pssH</i> intergenic region and 429 bp of <i>pssH</i>                                                                                                                 | This work |
| pBKpssI-C      | pBBR1MCS-2 with 1199 bp KpnI–XbaI fragment comprising <i>pssJ–pssI</i> intergenic region, <i>pssI</i> , and <i>pssI–pssH</i>                                                                                                     | This work |
| pRKpssI-C      | pRK7813 with 1199 bp BglII fragment comprising <i>pssJ–pssI</i> intergenic region, <i>pssI</i> , and <i>pssI–pssH</i>                                                                                                            | This work |
| pBKpssI-C-His6 | pBBR1MCS-2 with 1066 bp XbaI–SacI fragment comprising last 41 bp of <i>pssJ</i> , <i>pssJ–pssI</i> intergenic region, and <i>pssI</i> without stop codon, equipped with His <sub>6</sub> -tag coding sequence and TAA stop codon | This work |
| pCGpssG-U      | pCM351 with 650 bp KpnI–NdeI fragment comprising last 559 bp of <i>pssH</i> and <i>pssH–pssG</i> intergenic region                                                                                                               | This work |
| pCGpssG-UD     | pCGpssG-U with 652 bp ApaI–SacI fragment comprising last 18 bp of <i>pssG</i> and 638 bp of <i>pssF</i>                                                                                                                          | This work |
| pBKpssG-C      | pBBR1MCS-2 with 1065 bp KpnI–SacI fragment comprising 90 bp upstream of <i>pssG</i> and <i>pssG</i>                                                                                                                              | This work |
| pBKpssG-C-His6 | pBBR1MCS-2 with 972 bp KpnI–BglII fragment comprising <i>pssG</i> without stop codon, equipped with His <sub>6</sub> -tag coding sequence and TGA stop codon                                                                     | This work |
| pCGpssV-U      | pCM351 with 675 bp KpnI–NotI fragment comprising 40 bp of <i>mgl2</i> and <i>mgl2–pssV</i> intergenic region                                                                                                                     | This work |
| pCGpssV-UD     | pCGpssV-U with 563 bp ApaI–BshTI fragment comprising 563 bp downstream of <i>pssV</i>                                                                                                                                            | This work |
| pCGpssE-U      | pCM351 with 581 bp KpnI–NdeI fragment comprising 122 bp upstream of <i>pssD</i> , <i>pssD</i> , and 4 bp of <i>pssE</i>                                                                                                          | This work |
| pCGpssE-UD     | pCGpssE-U with 615 bp ApaI–BshTI fragment comprising last 16 bp of <i>pssE</i> and 599 bp upstream of <i>pssE</i>                                                                                                                | This work |
| pCGpssA-UD     | pCM351 with 584 bp KpnI–NotI fragment comprising last 7 bp of <i>pssB</i> and 577 bp of <i>pssB–pssA</i> intergenic region and 645 bp ApaI–SacI fragment comprising 645 bp downstream of <i>pssA</i>                             | [1]       |

**Supplementary Table S5. List of primers used for construction of mutagenesis and complementation plasmids**

| Primer           | Sequence (5'–3') <sup>a</sup>                            | Reference        | Application                                                                              |
|------------------|----------------------------------------------------------|------------------|------------------------------------------------------------------------------------------|
| pssI-U_FwEco     | aagaattcTGCTGAATGCCACGGAAAGTCG                           | This work        | amplification of genomic fragments for the construction of mutants obtained in this work |
| pssI-U_RvNde     | aaacatatgCAGTTATCAACCCCTCTGGTGAAGTC                      | This work        |                                                                                          |
| pssI-D_FwApa     | aagggcccTCGATTGCATAGGAGGCAGTAATTT                        | This work        |                                                                                          |
| pssI-D_RvSac     | agagctcAAGAATCCCCAGATGCCCCGTAAT                          | This work        |                                                                                          |
| pssG-U_FwKpn     | aaaggtaccCGGGCATCTGGGGATTCTTTA                           | This work        |                                                                                          |
| pssG-U_RvNde     | aaacatatgCAAACCCACTCGCCTCCTGAC                           | This work        |                                                                                          |
| pssG-D_FwApa     | aagggcccCAGGAGGTCGTGCATTGAAATTATCGGT                     | This work        |                                                                                          |
| pssG-D_RvSac     | agagctcTTTGCCCTGCTTGTGCCCGTGT                            | This work        |                                                                                          |
| pssV-U_FwKpn     | aaaggtaccTGGCGTGAACATAGGTGGCTG                           | This work        |                                                                                          |
| pssV-U_RvNot     | aagggccgcGCTTGTCTTCTCCGGCGTGCGA                          | This work        |                                                                                          |
| pssV-D_FwApa     | aagggcccAGCCCCGTGCGTCCTTTCAG                             | This work        |                                                                                          |
| pssV-D_RvBsh     | aaaaccggtGCGCTCGTGATGGAAGATTGGT                          | This work        |                                                                                          |
| pssE-U_FwKpn     | aaaggtaccCAAAGCTTCGACCAACCAAACC                          | This work        |                                                                                          |
| pssE-U_RvNde     | aaacatatgTCAAAGGACAGCTCCTGCGTAGT                         | This work        |                                                                                          |
| pssE-D_FwApa     | aagggcccTATTGCCGCCGTCTGAACCC                             | This work        |                                                                                          |
| pssE-D_RvBsh     | aaaaccggtCCTTCGGAACATCCTTGACGG                           | This work        | amplification of genomic fragments for <i>ΔpssI</i> mutant complementation               |
| pssI-C_FwKpn     | aaaggtaccGCGCCGATCCCATTCGAACA                            | This work        |                                                                                          |
| pssI-C_RvXba     | aatctagaGTGATGCTCCGGACCTCATTTTCG                         | This work        |                                                                                          |
| pssI-C_FwBgl     | aaaagatctGCGCCGATCCCATTCGAACA                            | This work        |                                                                                          |
| pssI-C_RvBgl     | aaaagatctGTGATGCTCCGGACCTCATTTTCG                        | This work        |                                                                                          |
| pssI-C-His_FwXba | aatctagaGGCGCGAGTTTTTCGGTAAGA                            | This work        | amplification of genomic fragments for <i>ΔpssG</i> mutant complementation               |
| pssI-C-His_RvSac | agagctcttaatatgatgatgatgatggtgCTGCGTCATCGTCTGAGAAACGTATC | This work        |                                                                                          |
| pssG-C_FwKpn     | aaaggtaccGAAAGTACTAAACCGCGGCA                            | This work        |                                                                                          |
| pssG-C_RvSac     | agagctcTCAATGCACGACCTCCTGCG                              | This work        |                                                                                          |
| pssG-C-His_FwKpn | aaaggtaccctgacacaggaacagctATGACGGATCCGAGAATTAGTGTC       | This work        | validation of cloning and sequencing of the pCM351 derivatives                           |
| pssG-C-His_RvBgl | aaaagatcttcaatgatgatgatgatggtgATGCACGACCTCCTGCGCTAGTC    | This work        |                                                                                          |
| pCMFw1           | GGGTTCCGCGCACATTTTC                                      | [10]             |                                                                                          |
| pCMRv1           | GCTGCGTTCGGTCAAGGT                                       | [10]             |                                                                                          |
| pCMFw2           | CCTAACAATTTCGTTCAAGCCGA                                  | [10]             |                                                                                          |
| pCMRv2           | CGCGCGAACGACATGGAG                                       | [10]             | validation of cloning and sequencing of the pBBR1-MCS2 and pRK7813 derivatives           |
| M13pUCf          | CCCAGTCACGAAGTTGTAAAACG                                  | Universal primer |                                                                                          |
| M13pUCr          | AGCGGATAACAATTTTCACACAGG                                 | Universal primer |                                                                                          |

<sup>a</sup> Introduced restriction sites are underlined

**Supplementary Table S6. List of plasmids and primers used for heterologous expression of *pssG* and *pssI* genes**

| Plasmid                | Relevant characteristics                                                                                         | Reference |
|------------------------|------------------------------------------------------------------------------------------------------------------|-----------|
| pQE-30                 | Expression vector, Ap <sup>r</sup>                                                                               | Qiagen    |
| pQE30- <i>his6pssG</i> | The <i>pssG</i> gene cloned into the BglIII–PstI site                                                            | This work |
| pQE30- <i>his6pssI</i> | The <i>pssI</i> gene cloned into the site BamHI–SmaI site                                                        | This work |
| pCOLADuet-1            | Expression vector, Km <sup>r</sup>                                                                               | Novagen   |
| pACYCDuet-1            | Expression vector, Cm <sup>r</sup>                                                                               | Novagen   |
| pCOLAPssGSt            | pCOLADuet-1 vector with 988 bp BglIII–KpnI fragment comprising <i>pssG</i> without stop codon, cloned into MCS-2 | This work |
| pACYCPssI              | pACYCDuet-1 vector with 963 bp SacI–NotI fragment comprising <i>pssI</i> without start codon, cloned into MCS-1  | This work |
| Primer                 | Sequence (5'–3') <sup>a</sup>                                                                                    | Reference |
| pssGpQE30/70fw         | aaaagatctACGGATCCGAGAATTAGTGT                                                                                    | This work |
| pssGpQE30rv            | aaactgcagTCAATGCACGACCTCCTGCG                                                                                    | This work |
| pssIpQE30/70fw         | aaaagatctTCGGATCTCTTCGTCAGCGT                                                                                    | This work |
| pssIpQE30rv            | aaacccgggTTACTGCGTCATCGTCTGAG                                                                                    | This work |
| pQErvers               | GTTCTGAGGTCATTACTGG                                                                                              | Qiagen    |
| pQEpromoter            | CCCGAAAAGTGCCACCTG                                                                                               | Qiagen    |
| PssGDuetMcs2NdeIFw     | aaacatatgACGGATCCGAGAATTAGTGTCATC                                                                                | This work |
| PssGDuetMcs2KpnIRv     | aaaggtaccATGCACGACCTCCTGCGC                                                                                      | This work |
| PssIDuetMcs1SacIFw     | aaagagctcGTCGGATCTCTTCGTCAGCG                                                                                    | This work |
| PssIDuetMcs1NotIRv     | aaagcggccgcTTACTGCGTCATCGTCTGAGAAAC                                                                              | This work |

<sup>a</sup> Introduced restriction sites are underlined



**Supplementary Table S7. List of plasmids and primers used for topology mapping of PssG and PssI proteins**

| Plasmid            | Relevant characteristics                                                                     | Reference |
|--------------------|----------------------------------------------------------------------------------------------|-----------|
| pPLE01             | pBluescript II SK(+) with <i>phoAlacZα</i> from pMA632; Ap <sup>r</sup>                      | [11]      |
| pPLE01-G100        | 315 nt fragment spanning the 5' end of the <i>pssG</i> gene cloned into the SacI-XbaI sites  | This work |
| pPLE01-G173        | 543 nt fragment spanning the 5' end of the <i>pssG</i> gene cloned into the SacI-XbaI sites  | This work |
| pPLE01-G201        | 618 nt fragment spanning the 5' end of the <i>pssG</i> gene cloned into the SacI-XbaI sites  | This work |
| pPLE01-G324        | 987 nt fragment spanning the entire <i>pssG</i> gene cloned into the SacI-XbaI sites         | This work |
| pPLE01-I148        | 459 nt fragment spanning the 5' end of the <i>pssI</i> gene cloned into the SacI-XbaI sites  | This work |
| pPLE01-I172        | 541 nt fragment spanning the 5' end of the <i>pssI</i> gene cloned into the SacI-XbaI sites  | This work |
| pPLE01-I269        | 822 nt fragment spanning the 5' end of the <i>pssI</i> gene cloned into the SacI-XbaI sites  | This work |
| pPLE01-I314        | 957 nt fragment spanning the entire <i>pssI</i> gene cloned into the SacI-XbaI sites         | This work |
| pPLE01-T201        | 618 nt fragment spanning the 5' end of the <i>pssT</i> gene cloned into the SacI-BamHI sites | [1]       |
| pPLE01-T243        | 744 nt fragment spanning the 5' end of the <i>pssT</i> gene cloned into the SacI-BamHI sites | [1]       |
| Primer             | Sequence (5'–3') <sup>a</sup>                                                                | Reference |
| GFwrbpLEOSacI      | aaagagctcGGAGAGTGGGTTTGATGAC                                                                 | This work |
| GRv100AlapLEOXbaI  | aaatctagaCGCATCTGCCTCGACGTC                                                                  | This work |
| GRv173pLEOXbaI     | aaatctagaCAATTCGCGACGCATGGTC                                                                 | This work |
| GRv201ValpLEOXbaI  | aaatctagaGACGATTTCCTGATCCTCT                                                                 | This work |
| GRv324HisplLEOXbaI | aaatctagaATGCACGACCTCCTGCGCTA                                                                | This work |
| IFwrbpLEOSacI      | aaagagctcCAAGAGGGTTGATAACTG                                                                  | This work |
| IRv148ValpLEOXbaI  | aaatctagaGACTATCGCAAAGGTGGAT                                                                 | This work |
| IRv172pLEOXbaI     | aaatctagaCAACTCTCGCCGGACGAT                                                                  | This work |
| IRv269AlapLEOXbaI  | aaatctagaTGCGCTTTCGATCCAGGTC                                                                 | This work |
| IRv314GlnpLEOXbaI  | aaatctagaCTGCGTCATCGTCTGAGAAA                                                                | This work |
| pssTFWrbpLE01SacI  | aaagagctcTCTAAGAGGTTGCAATGGCTTTG                                                             | [1]       |
| pssTA201RVnew      | aaaggatccCGCGGTCAGGCTGTCGA                                                                   | [1]       |
| pssTA243RVnew      | aaaggatccCGCGTTTCGGCCCGGCT                                                                   | [1]       |
| phoAlacZseq        | CATCCCATCGCCAATCAGCA                                                                         | [1]       |

<sup>a</sup> Primers were designed in a way that ensured inclusion of a 15-nt-region in front of the ATG (TTG) codon, with the ribosome binding site (rbs). Letters G, I and T denote the *pssG*, *pssI* or *pssT* genes, respectively.

**Supplementary Table S8. List of plasmids used for bacterial two-hybrid screening of PssG and PssI interactions**

| Plasmid                      | Relevant characteristics                    | Reference |
|------------------------------|---------------------------------------------|-----------|
| pUT18                        | <i>cyaAT18</i> , Ap <sup>R</sup>            | [5]       |
| pUT18C                       | <i>cyaAT18</i> , Ap <sup>R</sup>            | [5]       |
| pKNT25                       | <i>cyaAT25</i> , Km <sup>R</sup>            | [5]       |
| pKT25                        | <i>cyaAT25</i> , Km <sup>R</sup>            | [5]       |
| pUT18C-zip                   | Two-hybrid control plasmid, Ap <sup>R</sup> | [5]       |
| pKT25-zip                    | Two-hybrid control plasmid, Km <sup>R</sup> | [5]       |
| pUT18- <i>pssADECSFGHIJ</i>  | pUT18 with <i>pssADECSFGHIJ</i>             | [12]      |
| pUT18- <i>pssTL</i>          | pUT18 with <i>pssTL</i>                     | [13]      |
| pUT18- <i>pssP2</i>          | pUT18 with <i>pssP2</i>                     | [14]      |
| pUT18C- <i>pssADECSFGHIJ</i> | pUT18C with <i>pssADECSFGHIJ</i>            | [12]      |
| pUT18C- <i>pssPTL</i>        | pUT18C with <i>pssPTL</i>                   | [13]      |
| pUT18C- <i>pssP2</i>         | pUT18C with <i>pssP2</i>                    | [14]      |
| pKT25- <i>pssADECSFGHIJ</i>  | pKT25 with <i>pssADECSFGHIJ</i>             | [12]      |
| pKT25- <i>pssPTL</i>         | pKT25 with <i>pssPTL</i>                    | [13]      |
| pKT25- <i>pssP2</i>          | pKT25 with <i>pssP2</i>                     | [14]      |
| pKNT25- <i>pssADECSFGHIJ</i> | pKNT25 with <i>pssADECSFGHIJ</i>            | [12]      |

|        | T25-S | S-T25 | T25-E | E-T25 | T25-D | D-T25 | T25-A | A-T25 | T25-C | C-T25 | T25-F | F-T25 | T25-I | I-T25 | T25-G | G-T25 | T25-J | J-T25 | T25-H | H-T25 | T25-P | T25-T | T25-L | T25-P2 |
|--------|-------|-------|-------|-------|-------|-------|-------|-------|-------|-------|-------|-------|-------|-------|-------|-------|-------|-------|-------|-------|-------|-------|-------|--------|
| S-T18  |       |       |       |       |       |       |       |       |       |       |       |       | 92.4  | 99.9  | 100.1 | 99.3  |       |       |       |       |       |       |       |        |
| T18-S  |       |       |       |       |       |       |       |       |       |       |       |       | 95.6  | 108.7 | 105.6 | 100.1 |       |       |       |       |       |       |       |        |
| E-T18  |       |       |       |       |       |       |       |       |       |       |       |       | 95.0  | 110.6 | 100.7 | 90.6  |       |       |       |       |       |       |       |        |
| T18-E  |       |       |       |       |       |       |       |       |       |       |       |       | 95.7  | 107.7 | 102.1 | 99.1  |       |       |       |       |       |       |       |        |
| D-T18  |       |       |       |       |       |       |       |       |       |       |       |       | 108.3 | 107.2 | 102.3 | 102.1 |       |       |       |       |       |       |       |        |
| T18-D  |       |       |       |       |       |       |       |       |       |       |       |       | 103.2 | 118.2 | 110.1 | 103.2 |       |       |       |       |       |       |       |        |
| A-T18  |       |       |       |       |       |       |       |       |       |       |       |       | 104.5 | 99.7  | 117.5 | 96.7  |       |       |       |       |       |       |       |        |
| T18-A  |       |       |       |       |       |       |       |       |       |       |       |       | 241.2 | 94.0  | 117.8 | 103.2 |       |       |       |       |       |       |       |        |
| C-T18  |       |       |       |       |       |       |       |       |       |       |       |       | 237.1 | 212.3 | 113.4 | 128.8 |       |       |       |       |       |       |       |        |
| T18-C  |       |       |       |       |       |       |       |       |       |       |       |       | 392.7 | 99.7  | 91.4  | 387.4 |       |       |       |       |       |       |       |        |
| F-T18  |       |       |       |       |       |       |       |       |       |       |       |       | 97.4  | 90.3  | 98.1  | 97.0  |       |       |       |       |       |       |       |        |
| T18-F  |       |       |       |       |       |       |       |       |       |       |       |       | 488.5 | 94.3  | 107.6 | 101.5 |       |       |       |       |       |       |       |        |
| I-T18  | 94.9  | 100.9 | 87.7  | 109.0 | 179.2 | 156.9 | 623.5 | 114.8 | 786.1 | 354.9 | 432.5 | 441.2 | 854.5 | 236.5 | 104.7 | 725.2 | 440.5 | 384.0 | 100.4 | 91.8  | 136.9 | 282.9 | 105.2 | 405.2  |
| T18-I  | 92.9  | 99.9  | 89.9  | 99.7  | 99.7  | 99.7  | 555.5 | 96.8  | 533.9 | 807.7 | 101.4 | 286.0 | 547.1 | 452.4 | 119.7 | 218.7 | 312.1 | 211.7 | 101.5 | 99.8  | 105.4 | 106.8 | 108.4 | 141.3  |
| G-T18  | 108.0 | 100.1 | 95.1  | 98.3  | 95.0  | 410.0 | 134.5 | 100.3 | 121.9 | 119.7 | 109.8 | 103.0 | 533.5 | 98.1  | 103.9 | 353.7 | 180.3 | 150.9 | 93.8  | 102.9 | 108.8 | 112.7 | 101.3 | 136.7  |
| T18-G  | 97.8  | 89.1  | 100.2 | 117.9 | 92.5  | 109.8 | 105.8 | 100.4 | 170.7 | 103.7 | 92.4  | 97.2  | 366.7 | 92.9  | 116.6 | 93.6  | 107.8 | 105.7 | 98.3  | 97.0  | 104.3 | 103.9 | 104.3 | 105.6  |
| J-T18  |       |       |       |       |       |       |       |       |       |       |       |       | 130.2 | 296.3 | 83.6  | 107.4 |       |       |       |       |       |       |       |        |
| T18-J  |       |       |       |       |       |       |       |       |       |       |       |       | 503.5 | 91.6  | 732.7 | 100.2 |       |       |       |       |       |       |       |        |
| H-T18  |       |       |       |       |       |       |       |       |       |       |       |       | 406.1 | 89.2  | 94.4  | 97.0  |       |       |       |       |       |       |       |        |
| T18-H  |       |       |       |       |       |       |       |       |       |       |       |       | 124.9 | 89.9  | 89.8  | 89.6  |       |       |       |       |       |       |       |        |
| T18-P  |       |       |       |       |       |       |       |       |       |       |       |       | 122.5 | 119.2 | 107.0 | 114.9 |       |       |       |       |       |       |       |        |
| T-T18  |       |       |       |       |       |       |       |       |       |       |       |       | 120.4 | 111.5 | 114.0 | 118.6 |       |       |       |       |       |       |       |        |
| T18-T  |       |       |       |       |       |       |       |       |       |       |       |       | 114.0 | 108.8 | 119.2 | 112.0 |       |       |       |       |       |       |       |        |
| L-T18  |       |       |       |       |       |       |       |       |       |       |       |       | 105.9 | 106.7 | 109.9 | 118.4 |       |       |       |       |       |       |       |        |
| T18-L  |       |       |       |       |       |       |       |       |       |       |       |       | 101.3 | 111.7 | 118.7 | 111.9 |       |       |       |       |       |       |       |        |
| P2-T18 |       |       |       |       |       |       |       |       |       |       |       |       | 111.1 | 114.2 | 107.2 | 111.2 |       |       |       |       |       |       |       |        |
| T18-P2 |       |       |       |       |       |       |       |       |       |       |       |       | 122.1 | 111.1 | 111.6 | 123.6 |       |       |       |       |       |       |       |        |

  

|        | T25-S | S-T25 | T25-E | E-T25 | T25-D | D-T25 | T25-A | A-T25 | T25-C | C-T25 | T25-F | F-T25 | T25-I | I-T25 | T25-G | G-T25 | T25-J | J-T25 | T25-H | H-T25 | T25-P | T25-T | T25-L | T25-P2 |
|--------|-------|-------|-------|-------|-------|-------|-------|-------|-------|-------|-------|-------|-------|-------|-------|-------|-------|-------|-------|-------|-------|-------|-------|--------|
| S-T18  |       |       |       |       |       |       |       |       |       |       |       |       | 9.5   | 3.0   | 2.4   | 7.0   |       |       |       |       |       |       |       |        |
| T18-S  |       |       |       |       |       |       |       |       |       |       |       |       | 3.0   | 3.9   | 1.9   | 4.0   |       |       |       |       |       |       |       |        |
| E-T18  |       |       |       |       |       |       |       |       |       |       |       |       | 2.0   | 6.4   | 8.6   | 3.3   |       |       |       |       |       |       |       |        |
| T18-E  |       |       |       |       |       |       |       |       |       |       |       |       | 4.2   | 4.3   | 4.9   | 3.6   |       |       |       |       |       |       |       |        |
| D-T18  |       |       |       |       |       |       |       |       |       |       |       |       | 2.2   | 9.4   | 7.4   | 20.6  |       |       |       |       |       |       |       |        |
| T18-D  |       |       |       |       |       |       |       |       |       |       |       |       | 3.3   | 0.8   | 9.6   | 12.3  |       |       |       |       |       |       |       |        |
| A-T18  |       |       |       |       |       |       |       |       |       |       |       |       | 3.5   | 2.2   | 10.1  | 5.4   |       |       |       |       |       |       |       |        |
| T18-A  |       |       |       |       |       |       |       |       |       |       |       |       | 12.6  | 3.1   | 7.2   | 5.2   |       |       |       |       |       |       |       |        |
| C-T18  |       |       |       |       |       |       |       |       |       |       |       |       | 23.4  | 13.1  | 13.5  | 11.1  |       |       |       |       |       |       |       |        |
| T18-C  |       |       |       |       |       |       |       |       |       |       |       |       | 36.8  | 4.4   | 22.2  | 21.8  |       |       |       |       |       |       |       |        |
| F-T18  |       |       |       |       |       |       |       |       |       |       |       |       | 5.0   | 3.6   | 2.5   | 4.4   |       |       |       |       |       |       |       |        |
| T18-F  |       |       |       |       |       |       |       |       |       |       |       |       | 12.8  | 3.2   | 7.5   | 7.4   |       |       |       |       |       |       |       |        |
| I-T18  | 7.0   | 7.8   | 12.9  | 0.9   | 15.7  | 49.2  | 29.6  | 11.6  | 8.7   | 25.2  | 12.0  | 48.9  | 16.3  | 14.3  | 13.9  | 35.5  | 51.1  | 93.3  | 9.1   | 6.2   | 2.7   | 5.3   | 1.6   | 14.4   |
| T18-I  | 7.4   | 9.7   | 9.6   | 14.1  | 10.4  | 1.4   | 22.1  | 9.7   | 49.6  | 20.8  | 11.8  | 10.6  | 11.0  | 47.4  | 6.2   | 17.5  | 26.3  | 105.9 | 8.1   | 2.6   | 0.7   | 1.5   | 0.7   | 26.0   |
| G-T18  | 12.8  | 11.5  | 12.6  | 11.7  | 12.3  | 24.3  | 3.8   | 2.9   | 4.1   | 2.2   | 3.7   | 8.7   | 21.6  | 4.9   | 4.4   | 18.4  | 12.1  | 18.9  | 3.3   | 3.3   | 3.5   | 2.5   | 3.1   | 1.6    |
| T18-G  | 12.5  | 2.2   | 6.3   | 4.7   | 15.7  | 6.5   | 1.7   | 4.5   | 6.0   | 3.6   | 9.3   | 7.8   | 52.2  | 3.7   | 13.8  | 7.4   | 5.8   | 9.9   | 2.9   | 4.1   | 1.6   | 1.3   | 1.1   | 0.8    |
| J-T18  |       |       |       |       |       |       |       |       |       |       |       |       | 11.2  | 38.6  | 11.0  | 5.9   |       |       |       |       |       |       |       |        |
| T18-J  |       |       |       |       |       |       |       |       |       |       |       |       | 43.0  | 3.5   | 42.7  | 7.1   |       |       |       |       |       |       |       |        |
| H-T18  |       |       |       |       |       |       |       |       |       |       |       |       | 38.6  | 4.0   | 1.0   | 9.2   |       |       |       |       |       |       |       |        |
| T18-H  |       |       |       |       |       |       |       |       |       |       |       |       | 13.7  | 5.1   | 6.6   | 7.8   |       |       |       |       |       |       |       |        |
| T18-P  |       |       |       |       |       |       |       |       |       |       |       |       | 0.5   | 1.5   | 12.1  | 0.7   |       |       |       |       |       |       |       |        |
| T-T18  |       |       |       |       |       |       |       |       |       |       |       |       | 1.0   | 1.3   | 1.5   | 2.2   |       |       |       |       |       |       |       |        |
| T18-T  |       |       |       |       |       |       |       |       |       |       |       |       | 1.5   | 10.4  | 3.5   | 1.5   |       |       |       |       |       |       |       |        |
| L-T18  |       |       |       |       |       |       |       |       |       |       |       |       | 3.4   | 5.1   | 1.1   | 1.2   |       |       |       |       |       |       |       |        |
| T18-L  |       |       |       |       |       |       |       |       |       |       |       |       | 6.0   | 16.3  | 1.4   | 8.8   |       |       |       |       |       |       |       |        |
| P2-T18 |       |       |       |       |       |       |       |       |       |       |       |       | 21.4  | 4.5   | 8.7   | 9.9   |       |       |       |       |       |       |       |        |
| T18-P2 |       |       |       |       |       |       |       |       |       |       |       |       | 22.7  | 9.1   | 1.0   | 12.6  |       |       |       |       |       |       |       |        |

**Supplementary Figure S1. The activity of  $\beta$ -galactosidase measured in *E. coli* DHM1 strain carrying pairs of fusion plasmids.** Letters A, D, E, etc. in plasmid names stand for the last letter in the name of the GT gene, and the position of the letter indicates N- or C-terminal localization of the glycosyltransferase. The top panel presents mean activity (Miller units), the bottom panel – standard deviations. Blue boxes shade significant activities. Negative controls [pUT18(pUT18C)  $\times$  pKT25(pKNT25)] gave  $90.7 \pm 4.9 - 98.9 \pm 2.1$  Miller units. Positive control (pUT18zip  $\times$  pKT25zip) gave  $727.1 \pm 43.0$ . Pink surface – GTs, grey surface – polymerization and transport proteins.

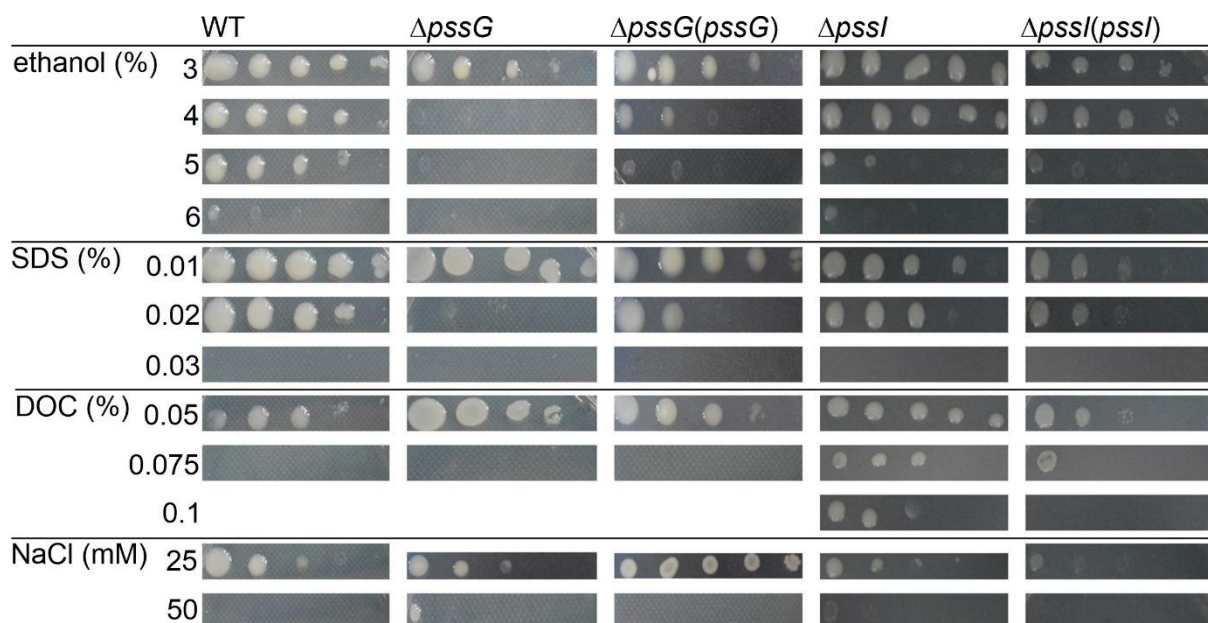

**Supplementary Figure S2. Plate sensitivity tests.** *pssG* deletion is associated with increased sensitivity to ethanol and SDS, while *pssI* deletion – a slight decrease in sensitivity to excess DOC.

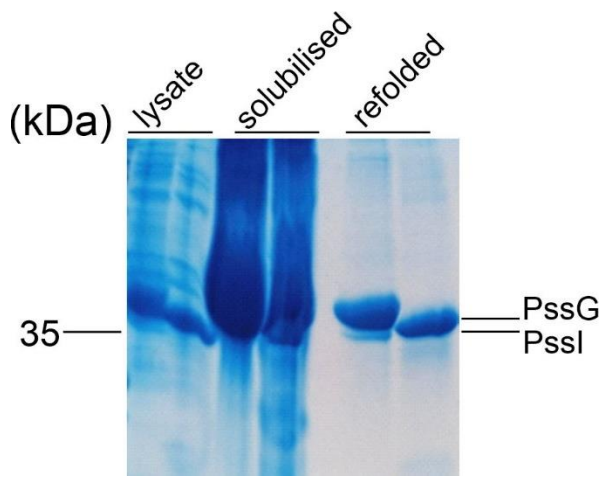

**Supplementary Figure S3. Recombinant PssG-Stag and PssI-His6 proteins at different stages of expression, purification, solubilization, and refolding.** SDS-PAGE was performed for samples of clarified lysate before inclusion bodies removal (left), proteins after solubilization of pure inclusion bodies (middle), and recombinant PssG and PssI after refolding (right) (in each pair of lanes left represents PssG and right – PssI, respectively).

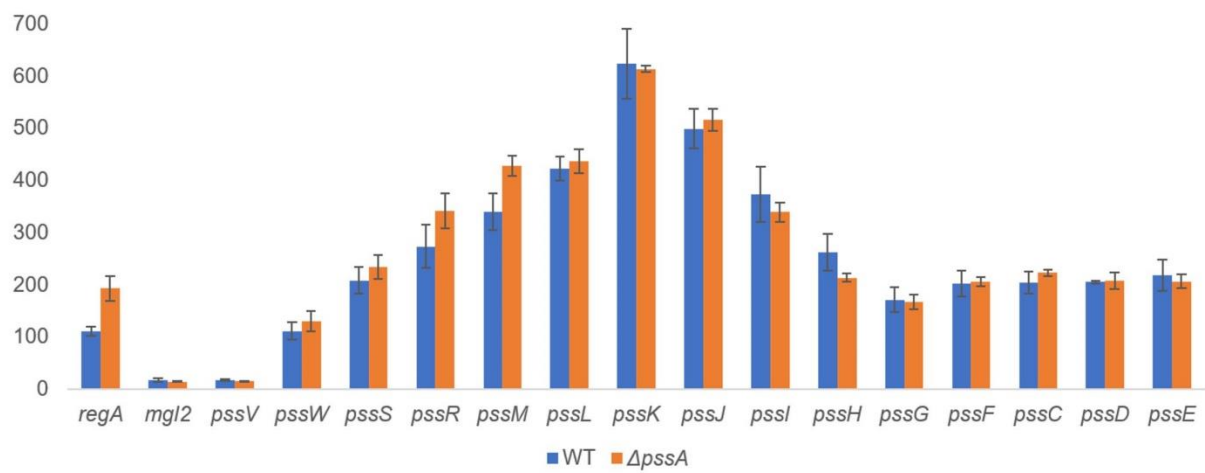

**Supplementary Figure S4. Level of gene expression (transcripts per million, TPM  $\pm$  SD) of the 5' end of the Pss-I region in RtTA1 wild-type (WT, blue bars) and  $\Delta pssA$  mutant (orange bars) strains.** Transcriptomic data has been obtained and published previously (BioProject Accession: PRJNA894372; [1])

## Supplementary References

1. Marczak, M.; Żebracki, K.; Koper, P.; Horbowicz, A.; Wójcik, M.; Mazur, A., A new face of the old gene: deletion of the *pssA*, encoding monotopic inner membrane phosphoglycosyl transferase in *Rhizobium leguminosarum*, leads to diverse phenotypes that could be attributable to downstream effects of the lack of exopolysaccharide. Article under review at *International Journal of Molecular Sciences*
2. Żebracki, K.; Koper, P.; Marczak, M.; Skorupska, A.; Mazur, A. Plasmid-Encoded RepA Proteins Specifically Autorepress Individual *repABC* Operons in the Multipartite *Rhizobium leguminosarum* bv. *trifolii* Genome. *PloS One* **2015**, 10, e0131907, doi:10.1371/journal.pone.0131907.
3. Sambrook, J.; Russell, D.W., *Molecular cloning: a laboratory manual*, 3rd ed.; Cold Spring Harbor Laboratory Press: Cold Spring Harbor, New York, 2001.
4. Simon, R.; Priefer, U.; Pühler, A. A broad host range mobilization system for *in vivo* genetic engineering: transposon mutagenesis in Gram negative bacteria. *Bio/Technology* **1983**, 1, 784-791, doi:10.1038/nbt1183-784.
5. Karimova, G.; Pidoux, J.; Ullmann, A.; Ladant, D. A bacterial two-hybrid system based on a reconstituted signal transduction pathway. *Proc. Natl. Acad. Sci. USA* **1998**, 95, 5752-5756, doi:10.1073/pnas.95.10.5752.
6. Chakravorty, A.K.; Zurkowski, W.; Shine, J.; Rolfe, B.G. Symbiotic nitrogen fixation: molecular cloning of *Rhizobium* genes involved in exopolysaccharide synthesis and effective nodulation. *J. Mol. Appl. Genet.* **1982**, 1, 585-596.
7. Marx, C.J.; Lidstrom, M.E. Broad-host-range *cre-lox* system for antibiotic marker recycling in gram-negative bacteria. *BioTechniques* **2002**, 33, 1062-1067, doi:10.2144/02335rr01.
8. Kovach, M.E.; Elzer, P.H.; Hill, D.S.; Robertson, G.T.; Farris, M.A.; Roop, R.M., 2nd; Peterson, K.M. Four new derivatives of the broad-host-range cloning vector pBBR1MCS, carrying different antibiotic-resistance cassettes. *Gene* **1995**, 166, 175-176, doi:10.1016/0378-1119(95)00584-1.
9. Jones, J.D.; Gutterson, N. An efficient mobilizable cosmid vector, pRK7813, and its use in a rapid method for marker exchange in *Pseudomonas fluorescens* strain HV37a. *Gene* **1987**, 61, 299-306, doi:10.1016/0378-1119(87)90193-4.
10. Marczak, M.; Żebracki, K.; Koper, P.; Turska-Szewczuk, A.; Mazur, A.; Wydrych, J.; Wójcik, M.; Skorupska, A. Mgl2 Is a hypothetical methyltransferase involved in exopolysaccharide production, biofilm formation, and motility in *Rhizobium leguminosarum* bv. *trifolii*. *Mol. Plant Microbe Interact.* **2019**, 32, 899-911, doi:10.1094/MPMI-01-19-0026-R.
11. Islam, S.T.; Taylor, V.L.; Qi, M.; Lam, J.S. Membrane topology mapping of the O-antigen flippase (Wzx), polymerase (Wzy), and ligase (WaaL) from *Pseudomonas aeruginosa* PAO1 reveals novel domain architectures. *mBio* **2010**, 1, doi:10.1128/mBio.00189-10.
12. Marczak, M.; Wójcik, M.; Żebracki, K.; Turska-Szewczuk, A.; Talarek, K.; Nowak, D.; Wawiórka, L.; Sieńczyk, M.; Łupicka-Słowik, A.; Bobrek, K.; Romańczuk, M.; Koper, P.; Mazur, A. PssJ Is a Terminal Galactosyltransferase Involved in the Assembly of the Exopolysaccharide Subunit in *Rhizobium Leguminosarum* bv. *Trifolii*. *Int. J. Mol. Sci.* **2020**, 21, doi:10.3390/ijms21207764.
13. Marczak, M.; Dźwierzyńska, M.; Skorupska, A. Homo- and heterotypic interactions between Pss proteins involved in the exopolysaccharide transport system in *Rhizobium leguminosarum* bv. *trifolii*. *Biol. Chem.* **2013**, 394, 541-559, doi:10.1515/hsz-2012-0161.
14. Marczak, M.; Matysiak, P.; Kutkowska, J.; Skorupska, A. PssP2 is a polysaccharide co-polymerase involved in exopolysaccharide chain-length determination in *Rhizobium leguminosarum*. *PloS One* **2014**, 9, e109106, doi:10.1371/journal.pone.0109106.
